# Supplementary material for: A nature-inspired protective coating on soft/wet biomaterials for SEM by aerobic oxidation of polyphenols
Source: Royal Society of Chemistry journal article supplement (doi:10.1039/c9mh01448a), 2020-01-01
Supplement: c9mh01448a1.pdf [file c9mh01448a1.pdf]

## Supplementary Information

### Nature-inspired protective coating on soft/wet biomaterials for SEM by aerobic oxidation of polyphenols

Hong Key Park,<sup>a</sup> Daiheon Lee,<sup>a</sup> Haeshin Lee,<sup>\*a</sup> and Seonki Hong<sup>\*b</sup>

a. Department of Chemistry, KAIST, Daejeon 34141, South Korea. E-mail: haeshin@kaist.ac.kr

b. Department of Emerging Material Science, DGIST, Daegu. 42988, South Korea. E-mail: seonkihong@dgist.ac.kr

#### Supplementary Videos

Supplementary Videos S1, S2, and S3 are available on the website.

#### Supplementary Figures

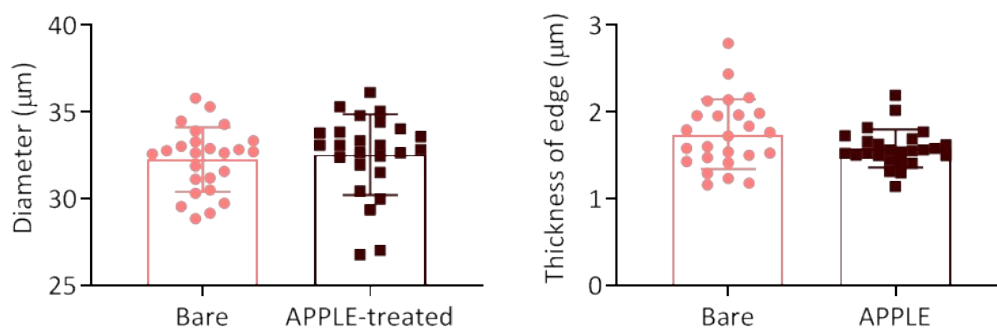

**Fig. S1** Quantitative analysis of the size of microbeads shown in Fig. 2b before and after APPLE treatment (left,  $n=25$ ,  $p=0.6335$ ) and the thickness of edge before and after spin coating on wet tissue shown in Fig. 2c (right,  $n=25$ ,  $p=0.0811$ ).

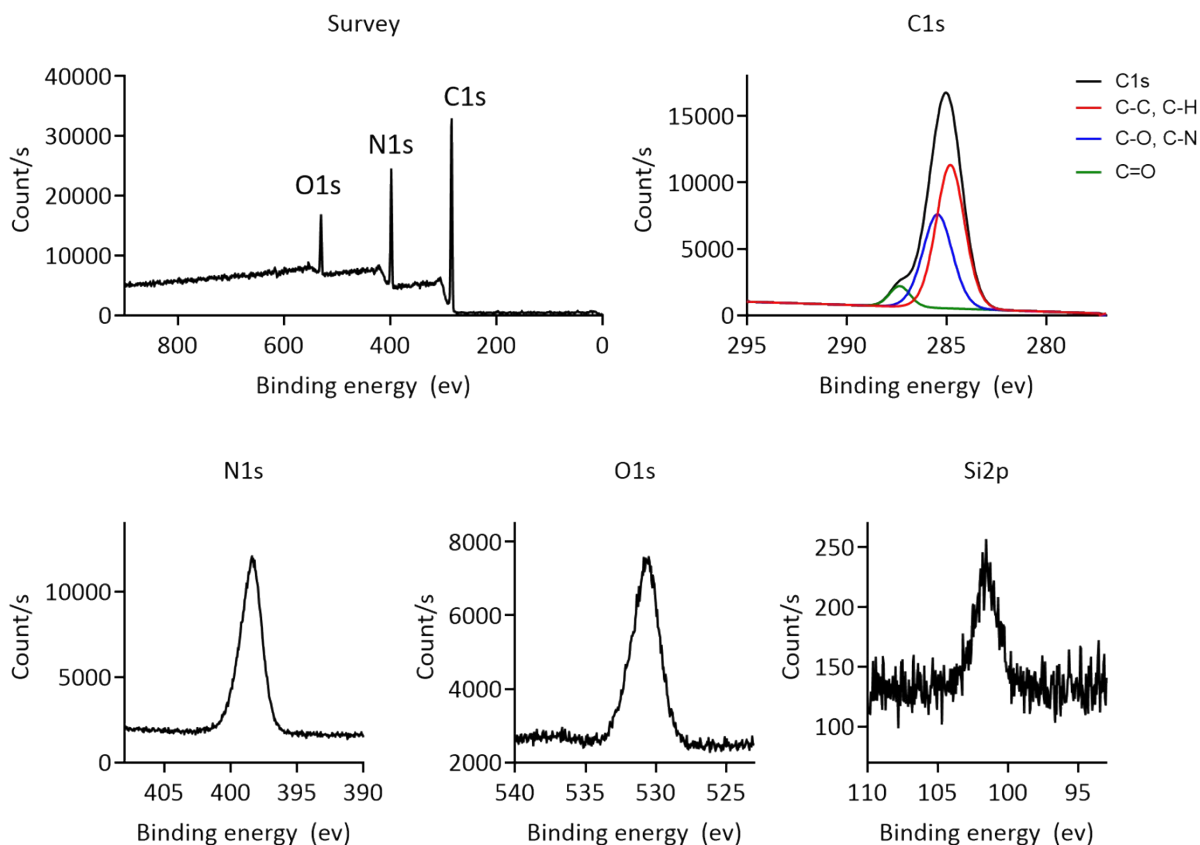

**Fig. S2** XPS analysis of APPLE on silicon wafer. Survey scan indicates the co-existence of nitrogen from PEI and oxygen from PG. Si2p peak confirms that the coating is similar or slightly thinner than 10-15 nm, the depth limitation in XPS analysis.

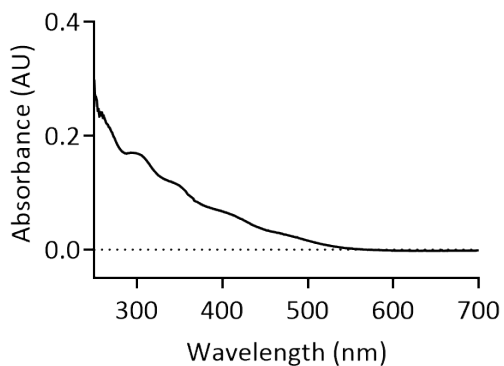

**Fig. S3** UV-vis absorbance of APPLE on glass substrate. Broad-range absorbance from UV to visible range is the characteristic of oxidized followed oligomerized/polymerized PG with PEI

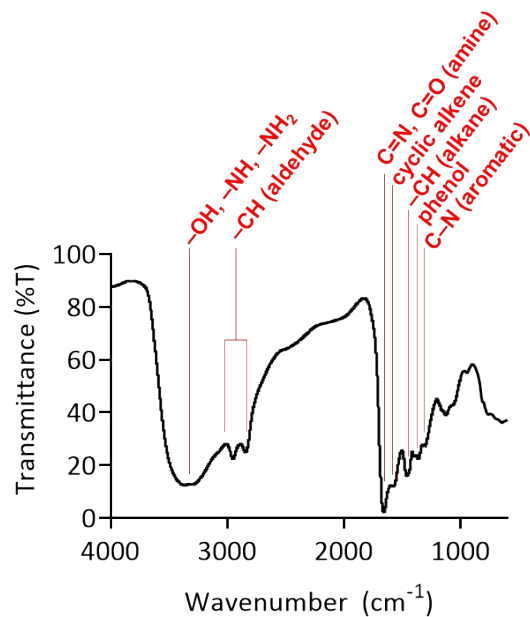

**Fig. S4** Infrared spectroscopic analysis of the bulk APPLE film. Peaks from PEI and PG were assigned.

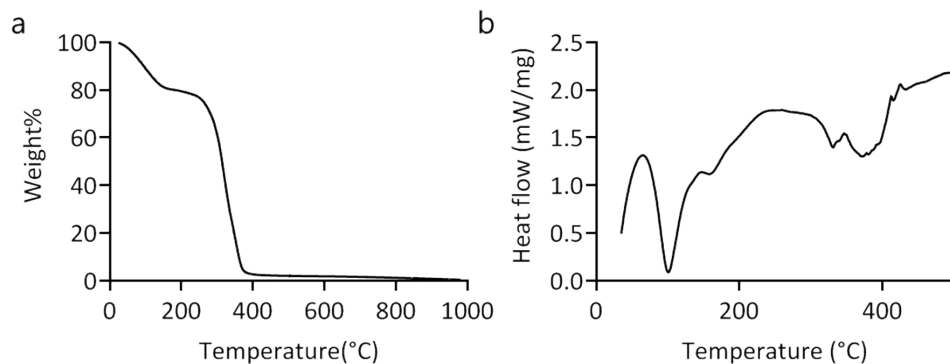

**Fig. S5** Thermal analysis of bulk APPLE. (a) Thermal gravimetric analysis (TGA) data and (b) differential scanning calorimetry (DSC) data showing complete decomposition at about 300-400 °C.

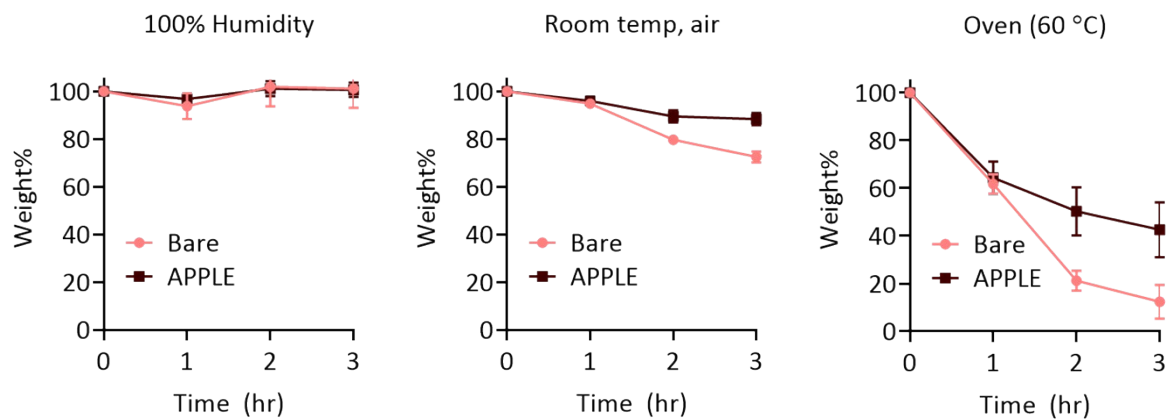

**Fig. S6** Dehydration protection capability of APPLE in various environments. Remaining weight% of APPLE-coated and bare 1% agarose gel incubated under 100% humidity, in the air at room temperature, in 60 °C oven were monitored up to three hours (n=5).
